# Supplementary material
Source: PubMed Central journal article supplement (PMC5985949)
Supplement: NIHMS77136-supplement-Supplementary_tables.pdf [file NIHMS77136-supplement-Supplementary_tables.pdf]

## Supplemental table 1: 'Viral' module transcripts

| Probe ID     | Symbol        |
|--------------|---------------|
| ILMN_1681101 | MARCH01       |
| ILMN_1703049 | AKAP7         |
| ILMN_1772964 | CCL8          |
| ILMN_1783621 | CMPK2         |
| ILMN_1733276 | CYSLTR1       |
| ILMN_1795181 | DDX60         |
| ILMN_1678422 | DHX58         |
| ILMN_2388547 | EPSTI1        |
| ILMN_1729749 | HERC5         |
| ILMN_1654639 | HERC6         |
| ILMN_1653466 | HES4          |
| ILMN_2058782 | IFI27         |
| ILMN_1760062 | IFI44         |
| ILMN_1723912 | IFI44L        |
| ILMN_2347798 | IFI6          |
| ILMN_1699331 | IFIT1         |
| ILMN_1707695 | IFIT1         |
| ILMN_1739428 | IFIT2         |
| ILMN_1664543 | IFIT3         |
| ILMN_1701789 | IFIT3         |
| ILMN_2239754 | IFIT3         |
| ILMN_1696654 | IFIT5         |
| ILMN_2054019 | ISG15         |
| ILMN_1813338 | LAG3          |
| ILMN_2170814 | LAMP3         |
| ILMN_3184334 | LOC100130769* |
| ILMN_1761281 | LOC441019*    |
| ILMN_1691156 | MT1A          |
| ILMN_1686664 | MT2A          |
| ILMN_2136089 | MTE           |
| ILMN_1672606 | OAS1          |
| ILMN_1675640 | OAS1          |
| ILMN_2410826 | OAS1          |
| ILMN_1674063 | OAS2          |
| ILMN_1709333 | OAS2          |
| ILMN_1736729 | OAS2          |
| ILMN_2248970 | OAS2          |
| ILMN_1745397 | OAS3          |
| ILMN_1681721 | OASL          |
| ILMN_1663347 | OTOF          |
| ILMN_1769546 | RIN2          |
| ILMN_1657871 | RSAD2         |

|              |         |
|--------------|---------|
| ILMN_2173975 | RTP4    |
| ILMN_1769550 | SLFN5   |
| ILMN_1683678 | SPATS2L |
| ILMN_1739573 | TNRC6A  |
| ILMN_3240420 | USP18   |
| ILMN_1742618 | XAF1    |
| ILMN_2370573 | XAF1    |
| ILMN_1751393 | ZNF684  |
| ILMN_1835092 | *       |

## Supplemental table 2: 'Bacterial' Module transcripts

| Probe ID     | Symbol   |
|--------------|----------|
| ILMN_1704579 | ABCA13   |
| ILMN_1655766 | ANKRD34B |
| ILMN_1812281 | ARG1     |
| ILMN_1815184 | ASPM     |
| ILMN_2089073 | ATP9A    |
| ILMN_1680955 | AURKA    |
| ILMN_1730867 | AZU1     |
| ILMN_2234697 | BEX1     |
| ILMN_1796138 | BMX      |
| ILMN_1766736 | BPI      |
| ILMN_1762713 | C19orf59 |
| ILMN_1695157 | CA4      |
| ILMN_3251610 | CD177    |
| ILMN_1774071 | CD177    |
| ILMN_1805519 | CD24     |
| ILMN_2060413 | CD24     |
| ILMN_1663390 | CDC20    |
| ILMN_1683450 | CDCA5    |
| ILMN_1712522 | CEACAM6  |
| ILMN_1806056 | CEACAM8  |
| ILMN_1779095 | CEBPE    |
| ILMN_1747016 | CEP55    |
| ILMN_1787691 | CITED4   |
| ILMN_1651282 | COL17A1  |
| ILMN_1799105 | COL17A1  |
| ILMN_1680424 | CTSG     |
| ILMN_1755741 | DACH1    |
| ILMN_2193213 | DEFA1    |
| ILMN_2102721 | DEFA1B   |
| ILMN_1679357 | DEFA1B   |
| ILMN_1725661 | DEFA1B   |
| ILMN_2165289 | DEFA3    |
| ILMN_1753347 | DEFA4    |
| ILMN_1815035 | DENND2C  |
| ILMN_1815626 | DHCR7    |
| ILMN_2165867 | DHCR7    |
| ILMN_1745623 | EFCAB4A  |
| ILMN_1706635 | ELANE    |
| ILMN_1745271 | EXOSC4   |
| ILMN_1714418 | FAM101B  |
| ILMN_1714065 | FAM101B* |
| ILMN_2285817 | FAM89A   |

|              |               |
|--------------|---------------|
| ILMN_2089977 | FKBP9L        |
| ILMN_1759649 | FLJ41352*     |
| ILMN_1785345 | GPR84         |
| ILMN_1669617 | GRB10         |
| ILMN_1812433 | HP            |
| ILMN_1772131 | IL1R2         |
| ILMN_1852022 | KIAA1881*     |
| ILMN_1784216 | KRTAP19-6     |
| ILMN_1692223 | LCN2          |
| ILMN_3185147 | LOC100130904* |
| ILMN_3247633 | LOC100134379* |
| ILMN_2096031 | LOC283392*    |
| ILMN_3286751 | LOC284648*    |
| ILMN_1657398 | LOC284757*    |
| ILMN_1804601 | LOC649923*    |
| ILMN_1753518 | LOC651524*    |
| ILMN_1710989 | LOC653061*    |
| ILMN_1693262 | LOC653600*    |
| ILMN_1677920 | LTF           |
| ILMN_2412761 | MAFG          |
| ILMN_1692260 | MAFG          |
| ILMN_1663640 | MAOA          |
| ILMN_1673409 | MGC16121*     |
| ILMN_1736026 | MMP8          |
| ILMN_1796316 | MMP9          |
| ILMN_1705183 | MPO           |
| ILMN_1751625 | MS4A3         |
| ILMN_1695530 | MS4A3         |
| ILMN_1756992 | MUC1          |
| ILMN_1674696 | OLAH          |
| ILMN_2116877 | OLFM4         |
| ILMN_1753954 | OLFM4         |
| ILMN_1723035 | OLR1          |
| ILMN_1711030 | OPLAH         |
| ILMN_1696584 | ORM1          |
| ILMN_1731785 | ORM2          |
| ILMN_1789096 | OSTalpha      |
| ILMN_1746888 | PCOLCE2       |
| ILMN_1796560 | PFKFB2        |
| ILMN_1723436 | PFKFB2        |
| ILMN_1704870 | PGLYRP1       |
| ILMN_1672650 | PKM2          |
| ILMN_1775327 | PKM2          |
| ILMN_2366634 | PKM2          |

|              |         |
|--------------|---------|
| ILMN_1728934 | PRC1    |
| ILMN_1729314 | PRG2    |
| ILMN_1668460 | PRTN3   |
| ILMN_1680945 | PTPN20* |
| ILMN_1675190 | RETN    |
| ILMN_2113126 | RNASE3  |
| ILMN_1689329 | SCD     |
| ILMN_1767337 | SFXN5   |
| ILMN_1785252 | SLC26A6 |
| ILMN_1748090 | SLC2A11 |
| ILMN_1671337 | SLC2A5  |
| ILMN_2114720 | SLPI    |
| ILMN_1664026 | SPDYE1  |
| ILMN_1739001 | TACSTD2 |
| ILMN_1768469 | TCN1    |
| ILMN_1811110 | TDRD9   |
| ILMN_2169490 | TDRD9   |
| ILMN_1811387 | TFF3    |
| ILMN_1806037 | TK1     |
| ILMN_1686097 | TOP2A   |
| ILMN_1736939 | UGCG    |
| ILMN_1678690 | UPB1    |
| ILMN_1700690 | VAT1    |
| ILMN_1763455 | VSTM1   |
| ILMN_1766896 | ZDHHC19 |
